# Supplementary figures and images for: The influence of diameter of multiwalled carbon nanotubes on mechanical, optical and electrical properties of Langmuir–Schaefer films
Source: Royal Society of Chemistry journal article supplement (doi:10.1039/d0cp03687k), 2020-01-01

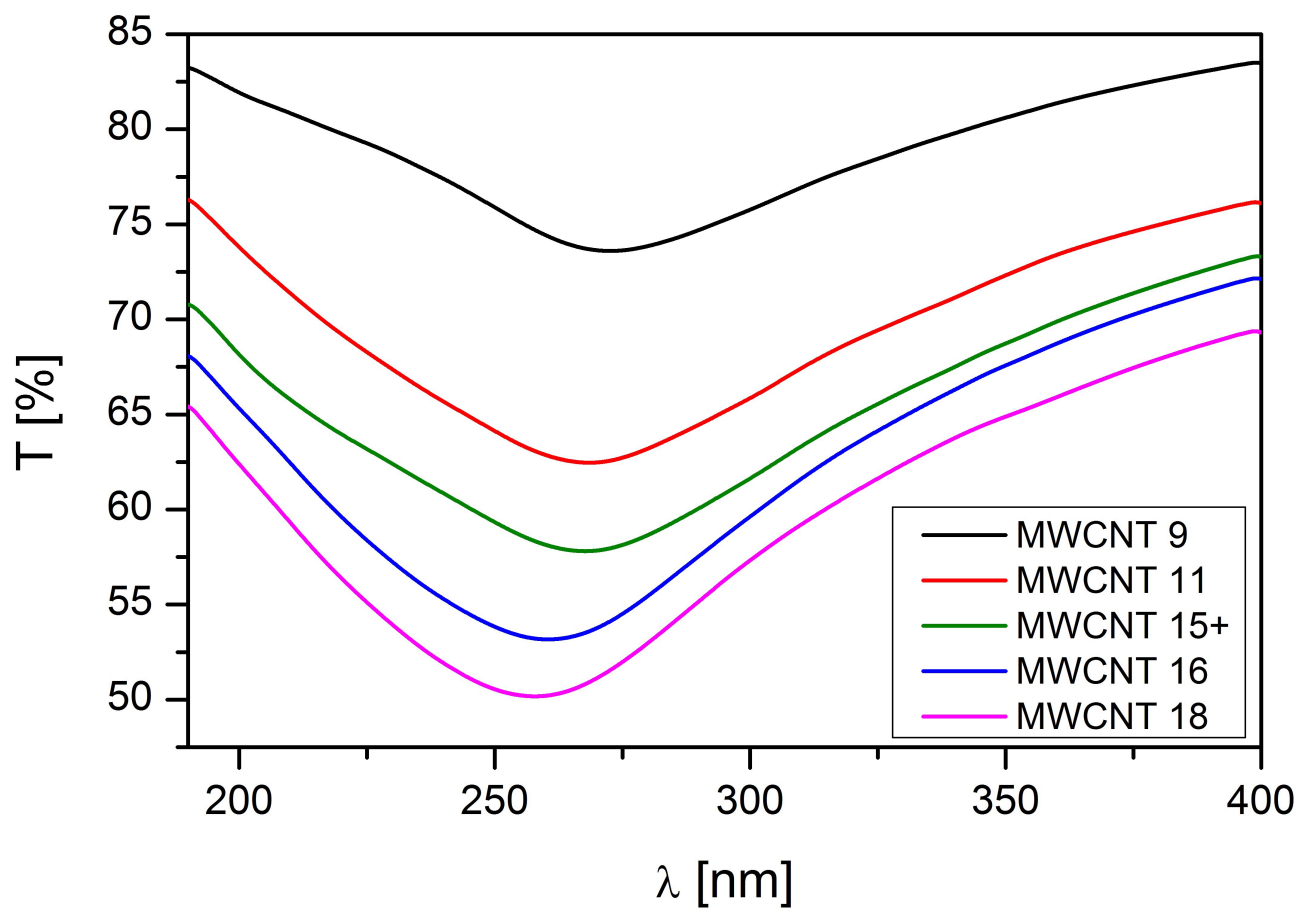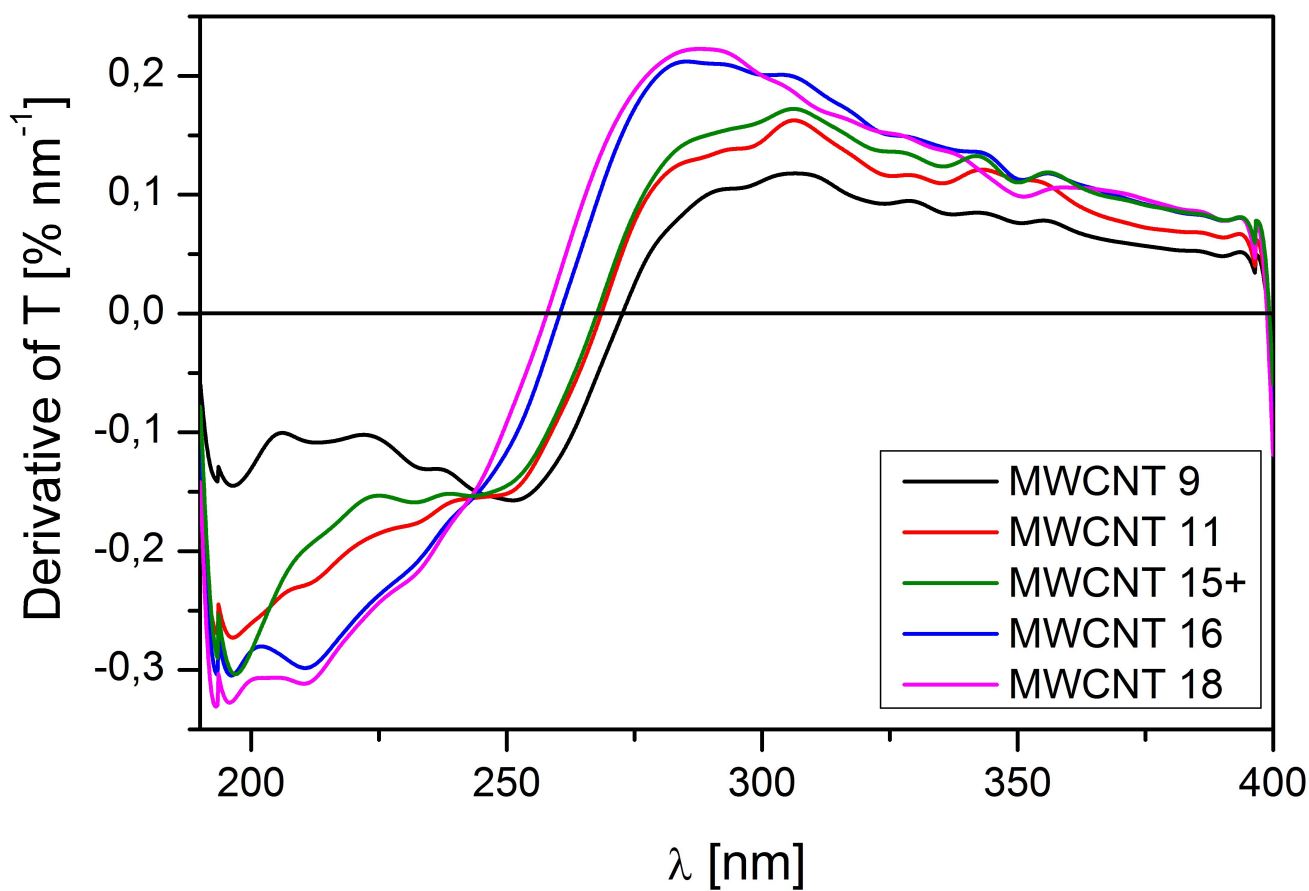

Supplement: d0cp03687k1.pdf [file d0cp03687k1.pdf]

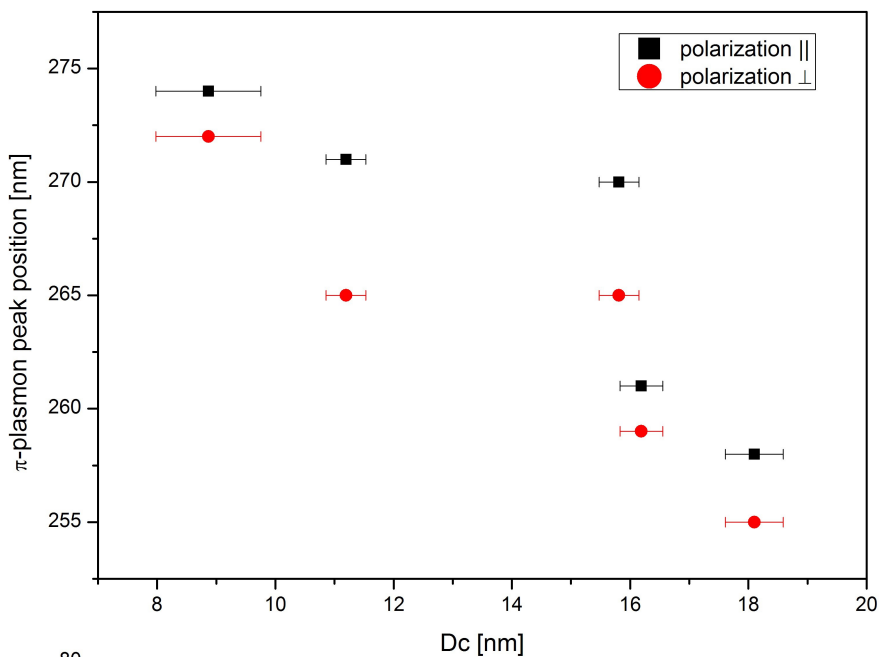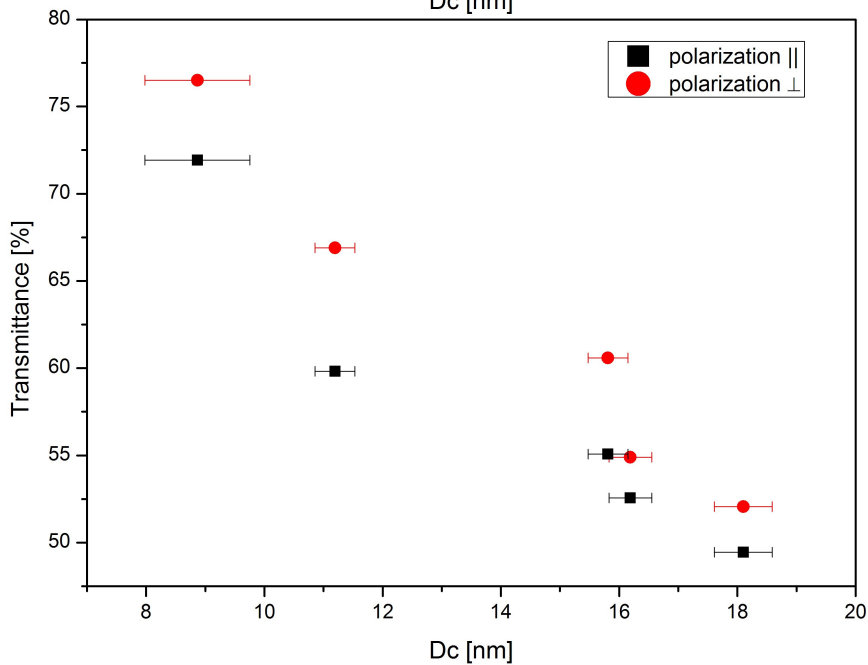

Supplement: d0cp03687k2.pdf [file d0cp03687k2.pdf]

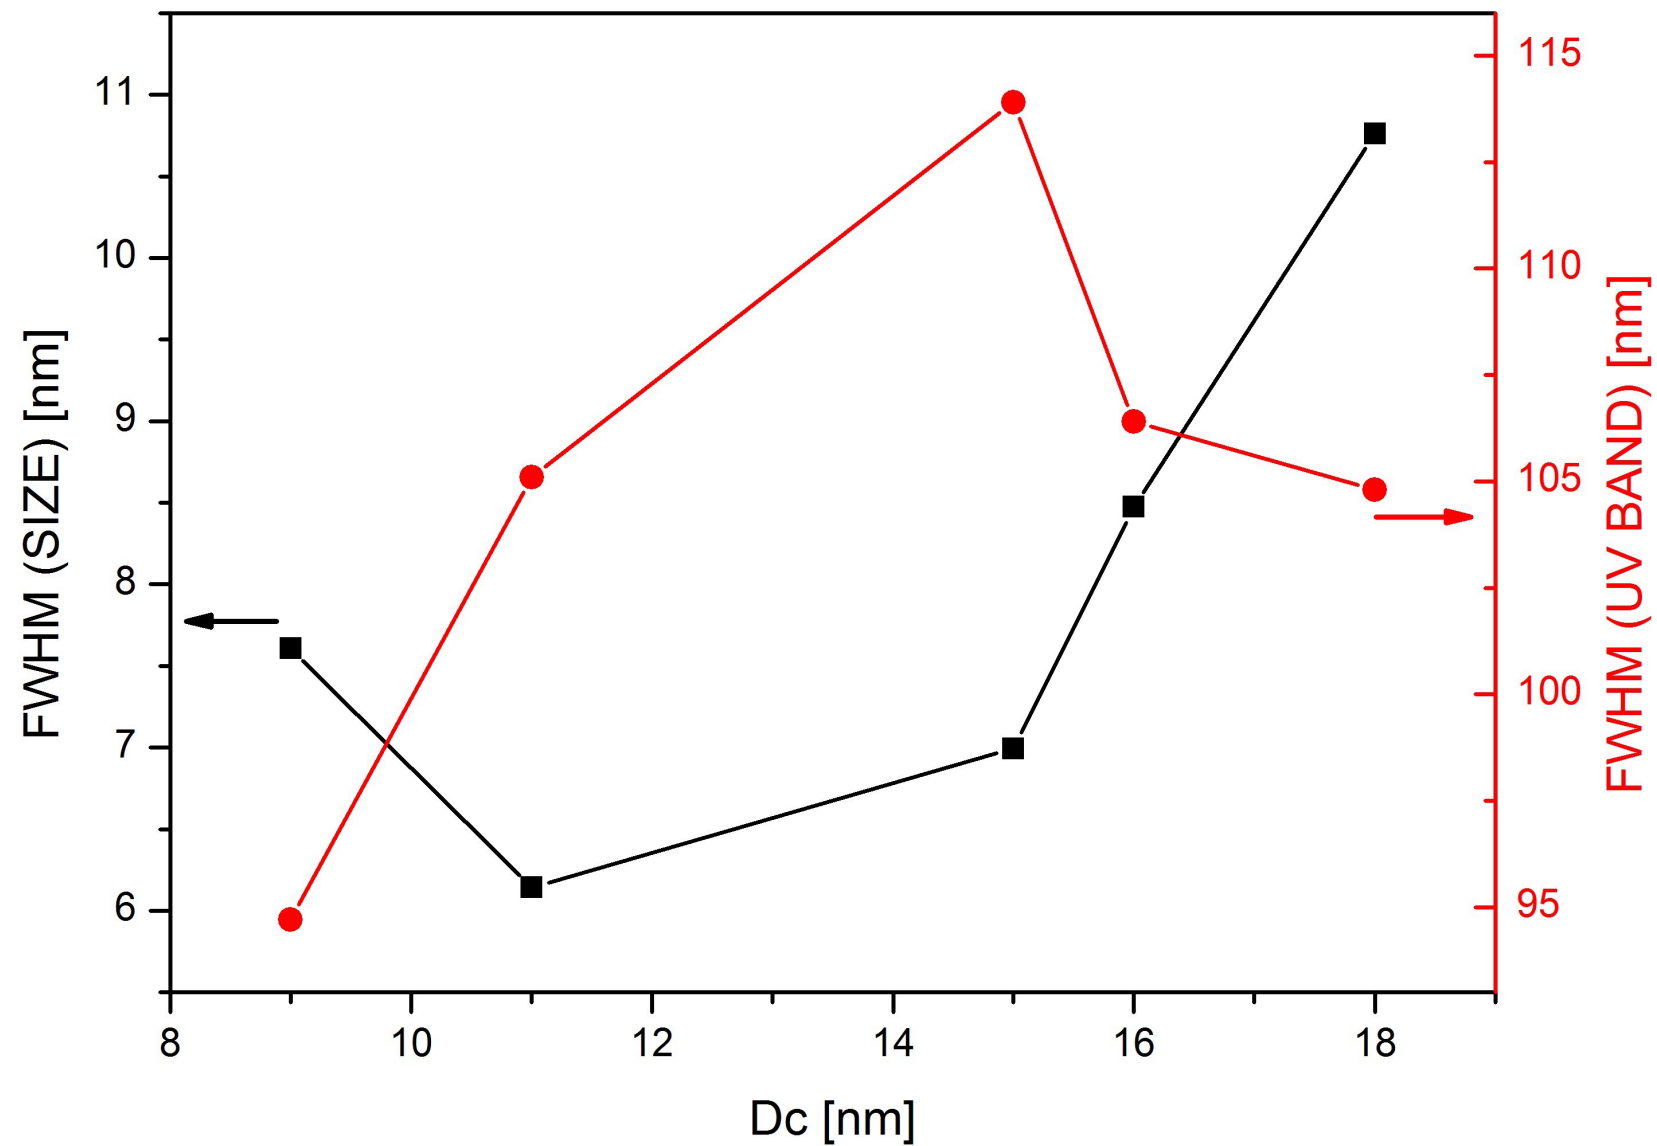

Supplement: d0cp03687k3.pdf [file d0cp03687k3.pdf]

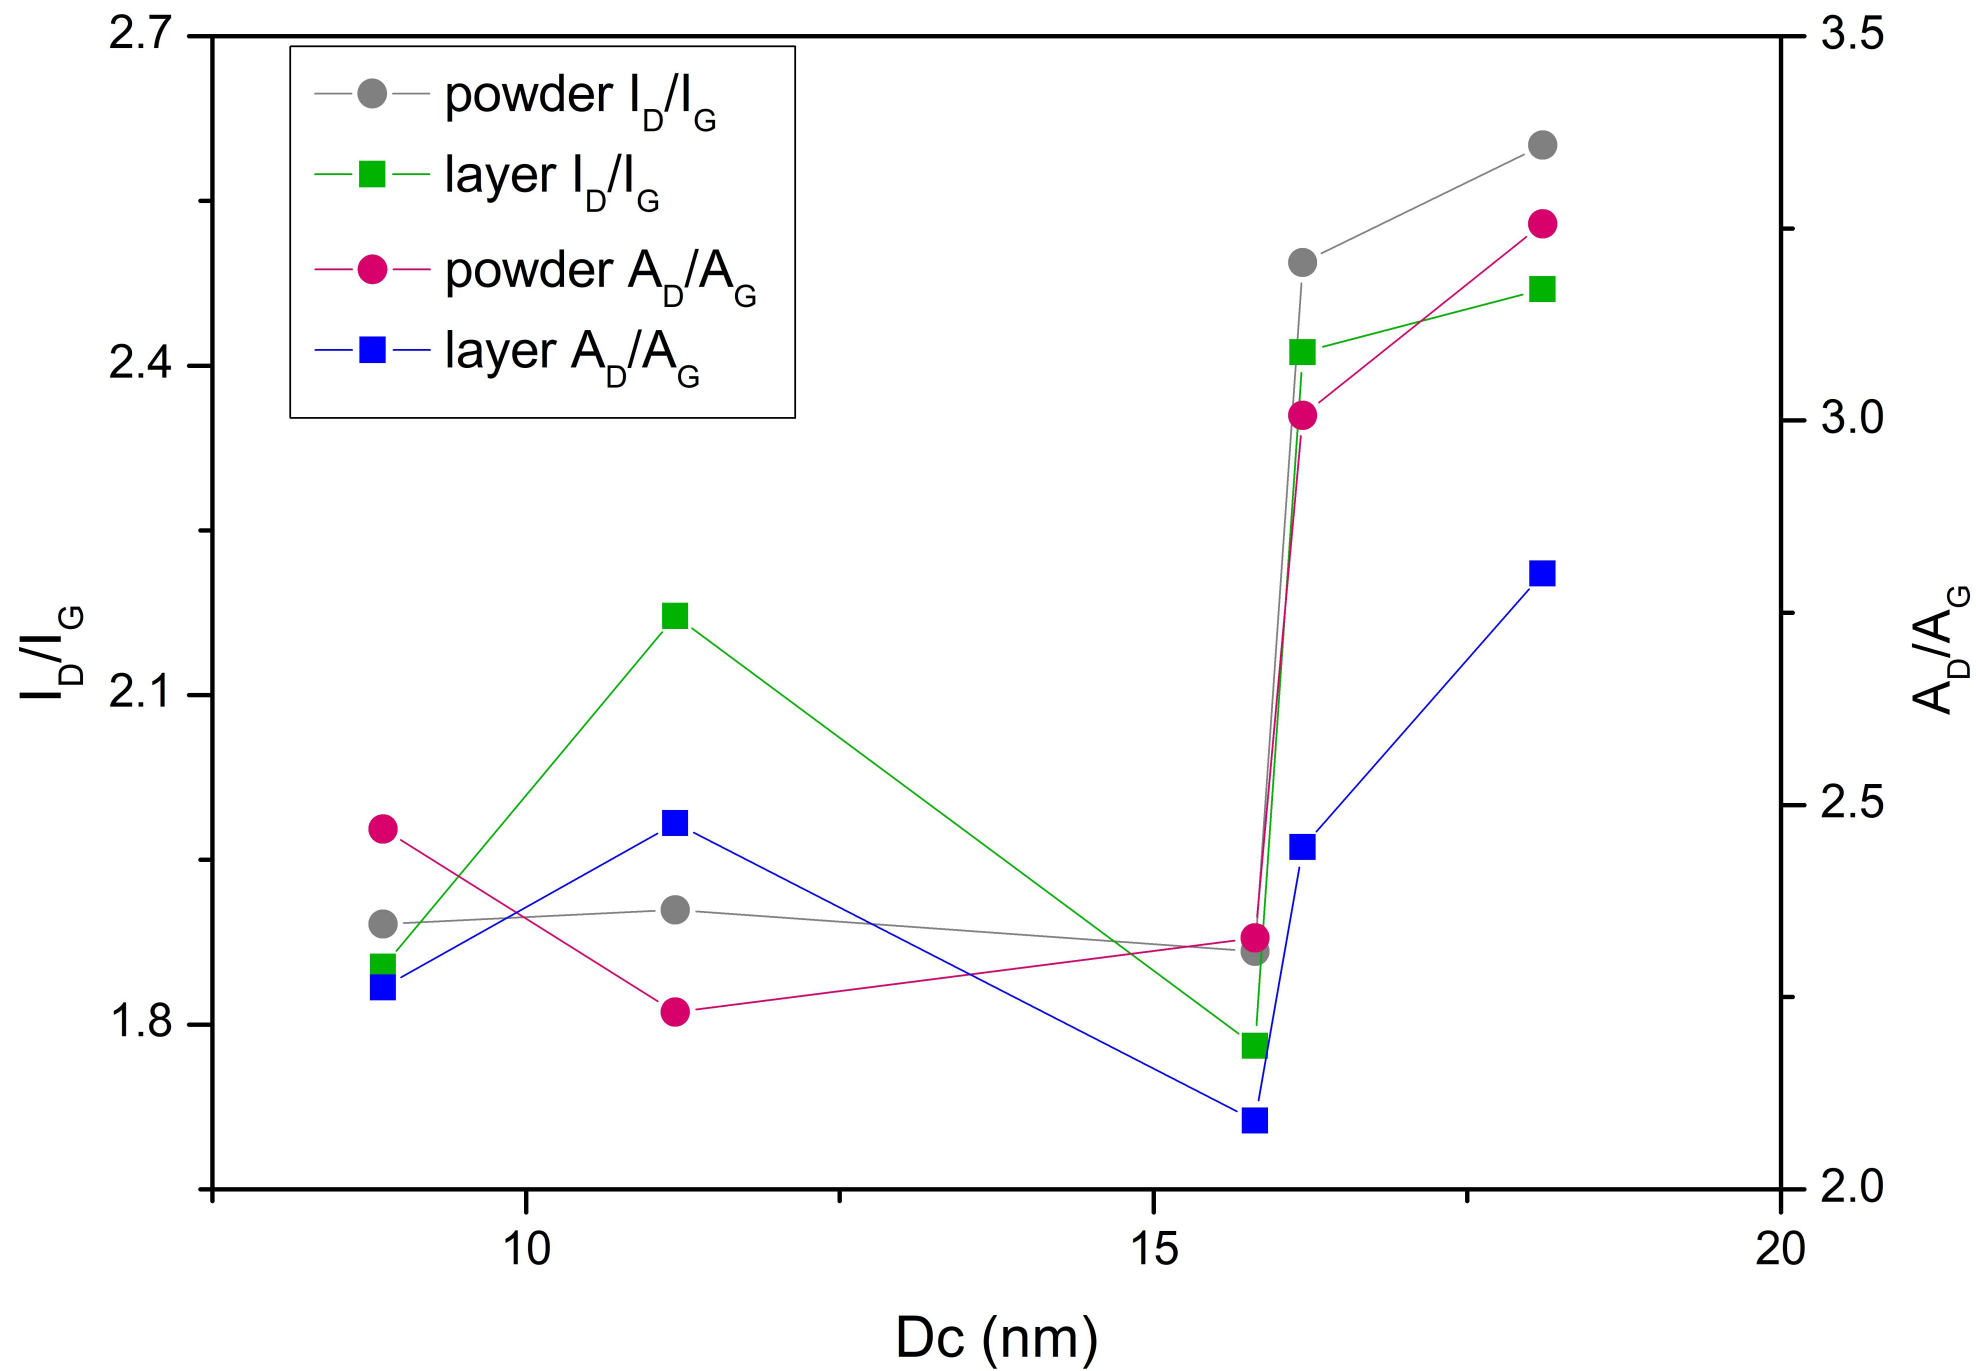

Supplement: d0cp03687k4.pdf [file d0cp03687k4.pdf]

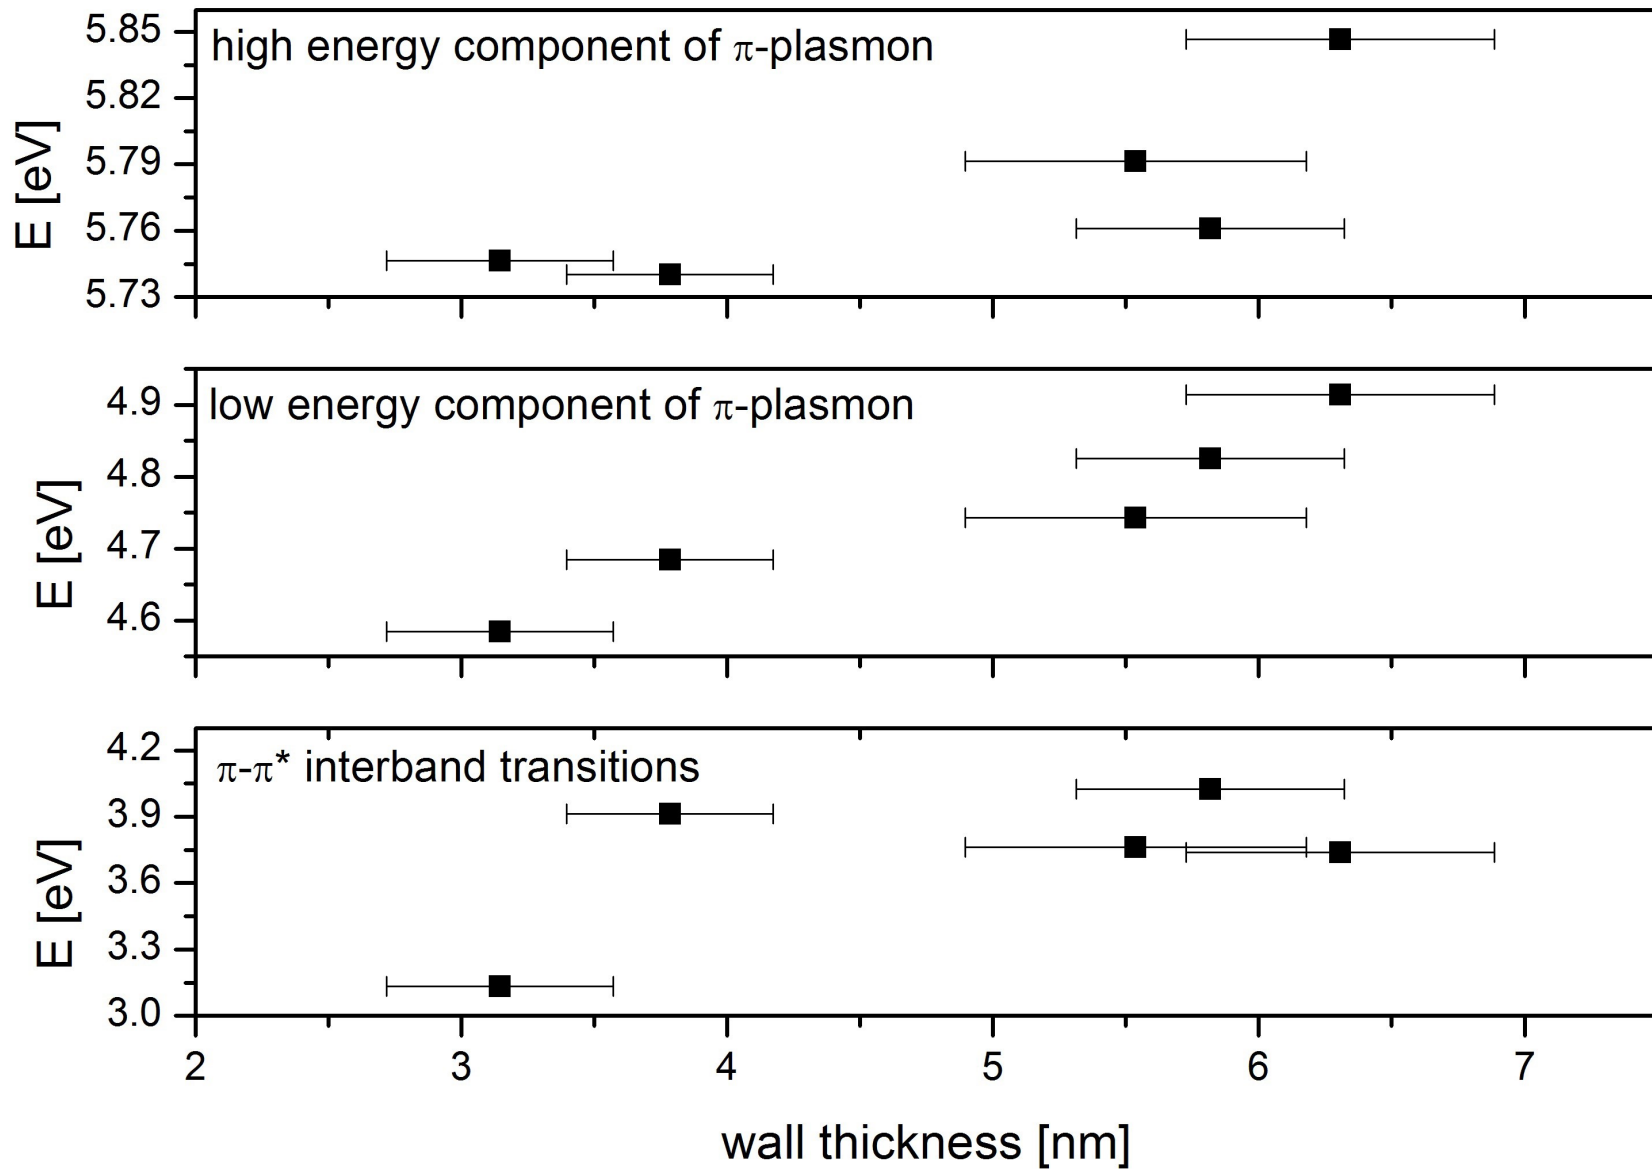

Supplement: d0cp03687k5.pdf [file d0cp03687k5.pdf]

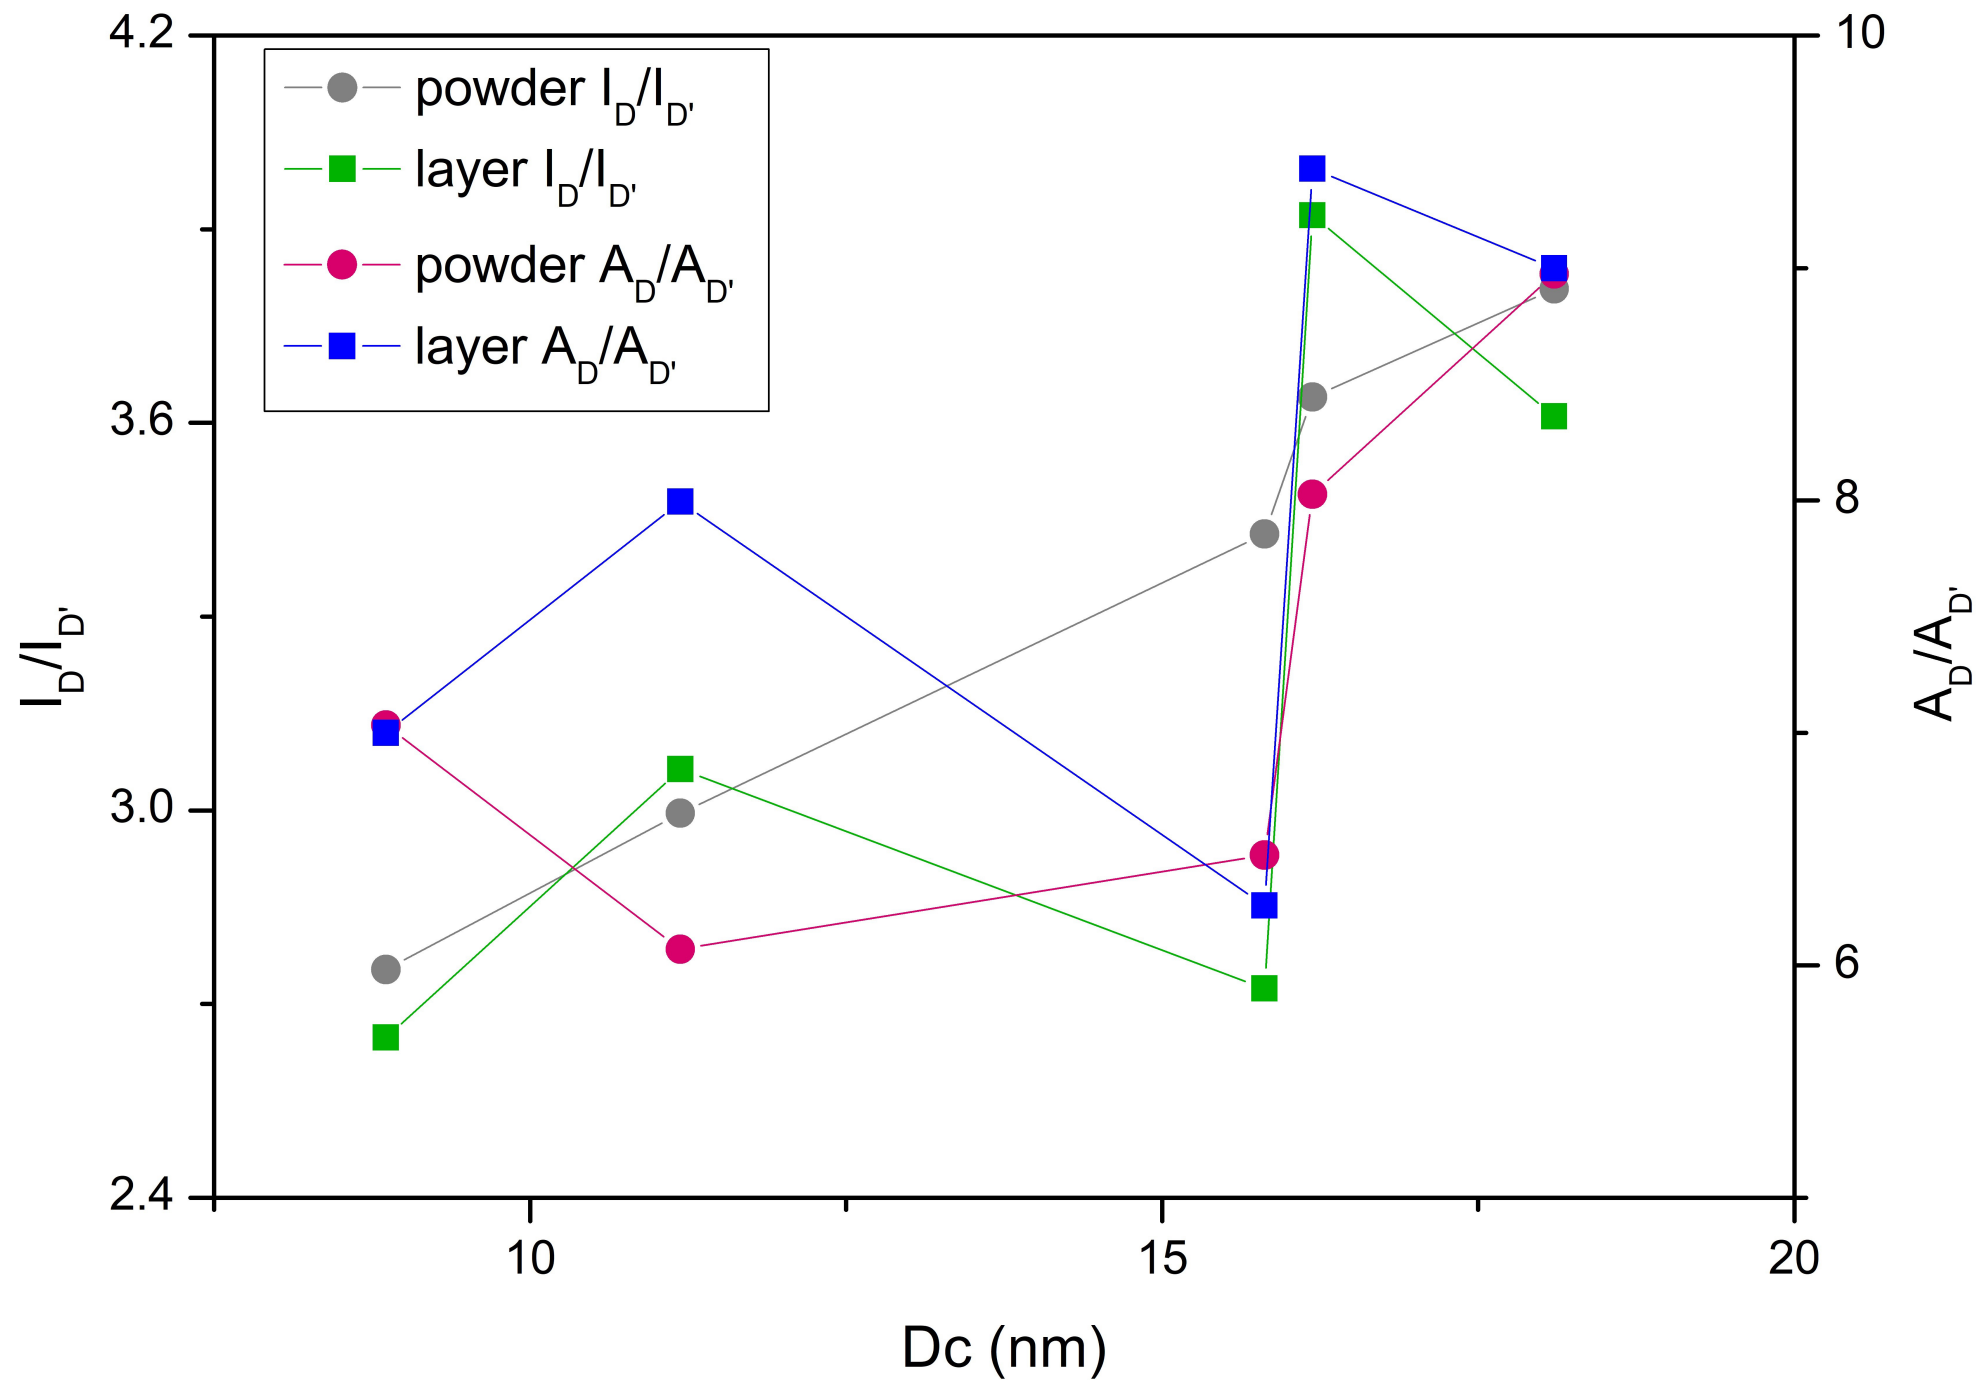

Supplement: d0cp03687k6.pdf [file d0cp03687k6.pdf]

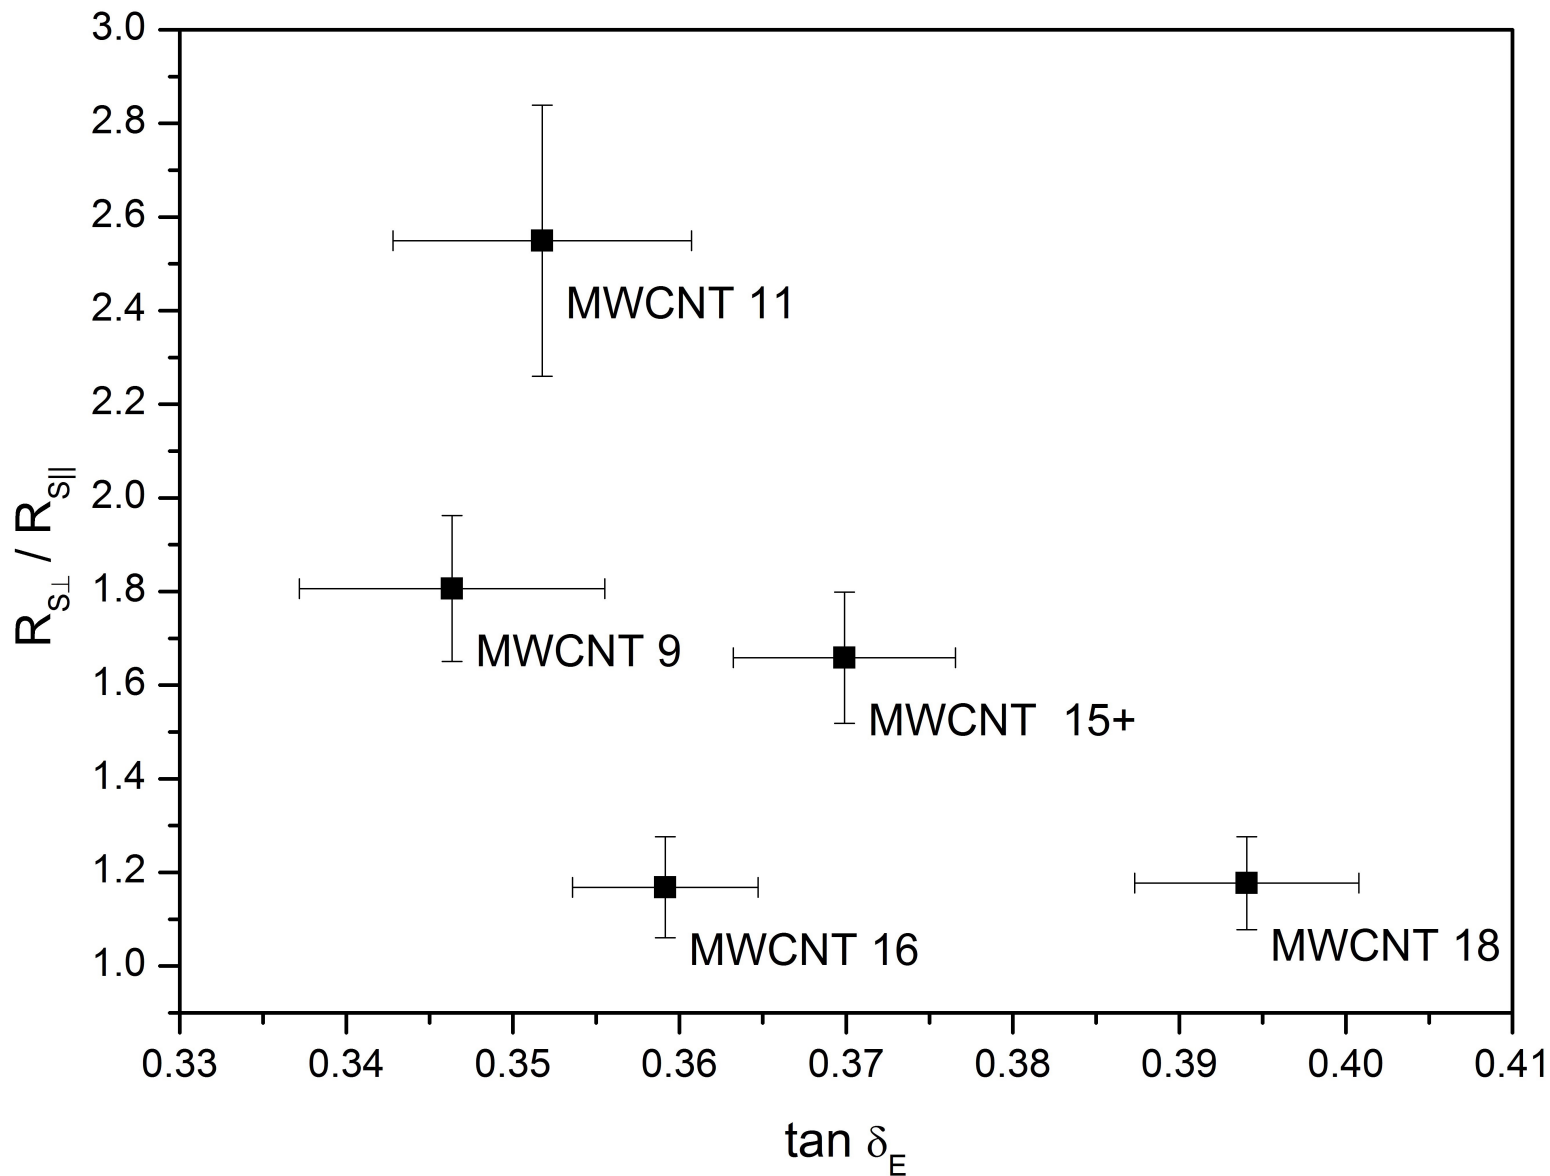

Supplement: d0cp03687k7.pdf [file d0cp03687k7.pdf]
